# Supplementary material
Source: ML conference proceedings conference paper supplement (https://proceedings.neurips.cc/paper_files/paper/2020/hash/7078971350bcefbc6ec2779c9b84a9bd-Abstract.html)
Supplement: Supplementary file [file 7078971350bcefbc6ec2779c9b84a9bd-Supplemental.pdf]

---

# Field-wise Learning for Multi-field Categorical Data

## Supplementary Material

---

For simplicity, we use the notations consistently with our paper.

### 1 Derivatives

Define  $s = \frac{-y}{1+\exp(y\hat{y})}$ . The derivatives of Logloss on one sample  $(\mathbf{x}, y)$  are then given by:

$$\frac{\partial \ell(\hat{y}, y)}{\partial U^{(i)}} = sV^{(i)}\mathbf{x}^{(i)}\mathbf{x}^{(-i)\top}, \quad \frac{\partial \ell(\hat{y}, y)}{\partial V^{(i)}} = sU^{(i)}\mathbf{x}^{(-i)}\mathbf{x}^{(i)\top}, \quad \frac{\partial \ell(\hat{y}, y)}{\partial \mathbf{b}^{(i)}} = s\mathbf{x}^{(i)}$$

Define  $K^{(i)} = U^{(i)}U^{(i)\top}(V^{(i)} - V_{mean}^{(i)})$ ,  $k^{(i)} = U^{(i)}U^{(i)\top}V_{mean}^{(i)}$ , and  $\mathbf{b}_{diff}^{(i)} = \mathbf{b}^{(i)} - \bar{b}^{(i)}\mathbf{1}_{d_i}$ .  $\bar{b}^{(i)}$  is the mean of elements in  $\mathbf{b}^{(i)}$ . Then for the regularization term  $R_1^{(i)} = \|W_b^{(i)} - \bar{\mathbf{w}}_b^{(i)}\mathbf{1}_{d_i}^\top\|_F^2$  and  $R_2^{(i)} = \|\bar{\mathbf{w}}_b^{(i)}\|_F^2$ , corresponding derivatives are:

$$\begin{aligned} \frac{\partial R_1^{(i)}}{\partial U^{(i)}} &= 2(V^{(i)} - V_{mean}^{(i)})(V^{(i)} - V_{mean}^{(i)})^\top U^{(i)}, \\ \frac{\partial R_1^{(i)}}{\partial V^{(i)}} &= 2(K^{(i)} - K_{mean}^{(i)}), \\ \frac{\partial R_1^{(i)}}{\partial \mathbf{b}^{(i)}} &= 2(\mathbf{b}_{diff}^{(i)} - \frac{\mathbf{1}_{d_i}\mathbf{1}_{d_i}^\top}{d_i}\mathbf{b}_{diff}^{(i)}), \end{aligned}$$

$$\frac{\partial R_2^{(i)}}{\partial U^{(i)}} = 2V_{mean}^{(i)}V_{mean}^{(i)\top}U^{(i)}, \quad \frac{\partial R_2^{(i)}}{\partial V^{(i)}} = \frac{2}{d_i}k^{(i)}\mathbf{1}_{d_i}^\top, \quad \frac{\partial R_2^{(i)}}{\partial \mathbf{b}^{(i)}} = \frac{2\bar{b}^{(i)}\mathbf{1}_{d_i}}{d_i}.$$

The subscript "mean" denotes that associated variables are vectors calculated from the column averages of corresponding matrices, and such vectors are augmented accordingly when subtraction from matrices.

### 2 Proof of Eq.(8)

We firstly apply [1, Theorem 3.3] to a composition of loss function and our hypothesis set  $\mathcal{H}$  defined as  $\ell \circ \mathcal{H}$ . The range of  $\ell \circ \mathcal{H}$  here is in  $[0, c]$ . This adds a  $c$  before  $3\sqrt{\frac{\log \frac{2}{\delta}}{2n}}$  and one can easily verify this following the same steps of proof of [1, Theorem 3.3]. Next, according to Talagrand's lemma [1, Lemma 5.7], for an  $L_\ell$ -Lipschitz continuous function  $\ell$ , we have:

$$\widehat{\mathfrak{R}}_S(\ell \circ \mathcal{H}) \leq L_\ell \widehat{\mathfrak{R}}_S(\mathcal{H}) \tag{1}$$

Combine Eq.(1) with [1, Theorem 3.3] and we complete the proof.

### 3 Proof of Theorem 3.1

Define  $\tilde{\mathbf{x}}_j^{(-i)} = [\tilde{\mathbf{x}}_j^{(-i)\top}, 1]^\top$  and use  $\langle \cdot, \cdot \rangle$  to denote inner-product. By definition of Rademacher complexity and the hypothesis set  $\mathcal{H}$ , we have:

$$\widehat{\mathfrak{R}}_S(\mathcal{H}) = \mathbb{E}_\sigma \left[ \sup_{h \in \mathcal{H}} \frac{1}{n} \sum_{j=1}^n \sigma_j h(\mathbf{x}_j) \right] \quad (2)$$

$$= \mathbb{E}_\sigma \left[ \sup_{h \in \mathcal{H}} \frac{1}{n} \sum_{j=1}^n \sigma_j \sum_{i=1}^m \mathbf{x}_j^{(i)\top} (W^{(i)\top} \mathbf{x}_j^{(-i)} + \mathbf{b}^{(i)}) \right] \quad (3)$$

$$\leq \frac{1}{n} \sum_{i=1}^m \mathbb{E}_\sigma \left[ \sup_{h \in \mathcal{H}} \sum_{j=1}^n \sigma_j \mathbf{x}_j^{(i)\top} W_b^{(i)\top} \tilde{\mathbf{x}}_j^{(-i)} \right] \quad (4)$$

$$= \frac{1}{n} \sum_{i=1}^m \mathbb{E}_\sigma \left[ \sup_{h \in \mathcal{H}} \sum_{j=1}^n \langle W_b^{(i)}, \sigma_j \tilde{\mathbf{x}}_j^{(-i)} \mathbf{x}_j^{(i)\top} \rangle \right] \quad (5)$$

and see that:

$$\mathbb{E}_\sigma \left[ \sup_{h \in \mathcal{H}} \sum_{j=1}^n \langle W_b^{(i)}, \sigma_j \tilde{\mathbf{x}}_j^{(-i)} \mathbf{x}_j^{(i)\top} \rangle \right] \quad (6)$$

$$= \mathbb{E}_\sigma \left[ \sup_{h \in \mathcal{H}} \langle W_b^{(i)} - \bar{\mathbf{w}}_b^{(i)} \mathbf{1}_{d_i}^\top, \sum_{j=1}^n \sigma_j \tilde{\mathbf{x}}_j^{(-i)} \mathbf{x}_j^{(i)\top} \rangle + \langle \bar{\mathbf{w}}_b^{(i)} \mathbf{1}_{d_i}^\top, \sum_{j=1}^n \sigma_j \tilde{\mathbf{x}}_j^{(-i)} \mathbf{x}_j^{(i)\top} \rangle \right] \quad (7)$$

$$= \mathbb{E}_\sigma \left[ \sup_{h \in \mathcal{H}} \langle W_b^{(i)} - \bar{\mathbf{w}}_b^{(i)} \mathbf{1}_{d_i}^\top, \sum_{j=1}^n \sigma_j \tilde{\mathbf{x}}_j^{(-i)} \mathbf{x}_j^{(i)\top} \rangle + \langle \bar{\mathbf{w}}_b^{(i)}, \sum_{j=1}^n \sigma_j \tilde{\mathbf{x}}_j^{(-i)} \rangle \right] \quad (8)$$

$$\leq \mathbb{E}_\sigma \left[ \sup_{h \in \mathcal{H}} \|W_b^{(i)} - \bar{\mathbf{w}}_b^{(i)} \mathbf{1}_{d_i}^\top\|_F \left\| \sum_{j=1}^n \sigma_j \tilde{\mathbf{x}}_j^{(-i)} \mathbf{x}_j^{(i)\top} \right\|_F + \|\bar{\mathbf{w}}_b^{(i)}\|_F \left\| \sum_{j=1}^n \sigma_j \tilde{\mathbf{x}}_j^{(-i)} \right\|_F \right] \quad (9)$$

$$\leq \mathbb{E}_\sigma \left[ \sup_{h \in \mathcal{H}} \|W_b^{(i)} - \bar{\mathbf{w}}_b^{(i)} \mathbf{1}_{d_i}^\top\|_F \left\| \sum_{j=1}^n \sigma_j \tilde{\mathbf{x}}_j^{(-i)} \mathbf{x}_j^{(i)\top} \right\|_F \right] + \mathbb{E}_\sigma \left[ \sup_{h \in \mathcal{H}} \|\bar{\mathbf{w}}_b^{(i)}\|_F \left\| \sum_{j=1}^n \sigma_j \tilde{\mathbf{x}}_j^{(-i)} \right\|_F \right] \quad (10)$$

$$\leq N_1^{(i)} \mathbb{E}_\sigma \left[ \left\| \sum_{j=1}^n \sigma_j \tilde{\mathbf{x}}_j^{(-i)} \mathbf{x}_j^{(i)\top} \right\|_F \right] + N_2^{(i)} \mathbb{E}_\sigma \left[ \left\| \sum_{j=1}^n \sigma_j \tilde{\mathbf{x}}_j^{(-i)} \right\|_F \right] \quad (11)$$

Notice that following inequalities hold:

$$\mathbb{E}_\sigma \left[ \left\| \sum_{j=1}^n \sigma_j \tilde{\mathbf{x}}_j^{(-i)} \mathbf{x}_j^{(i)\top} \right\|_F \right] \quad (12)$$

$$\leq \mathbb{E}_\sigma \left[ \left\| \sum_{j=1}^n \sigma_j \tilde{\mathbf{x}}_j^{(-i)} \mathbf{x}_j^{(i)\top} \right\|_F^2 \right]^{\frac{1}{2}} \quad (13)$$

$$= \left( \sum_{j=1}^n \|\tilde{\mathbf{x}}_j^{(-i)} \mathbf{x}_j^{(i)\top}\|_F^2 \right)^{\frac{1}{2}} \quad (14)$$

$$= (mn)^{\frac{1}{2}} \quad (15)$$

Table 1: The hyper-parameters for each baseline. lr: learning rate; wdcy: weight decay; ebd\_dim: embedding dimension or rank; a\_p: number of anchor points; l2\_reg: weight for L2 regularization term; dr: dropout rate.

| Method | Avazu                                             | Criteo                                                             |
|--------|---------------------------------------------------|--------------------------------------------------------------------|
| LR     | lr: 0.1, wdcy: 1e-9                               | lr: 0.1, wdcy: 1e-9                                                |
| GBDT   | num_leaves: 1e4, max_depth: 100                   | num_leaves: 1e3, max_depth: 50                                     |
| FM     | lr: 0.1, wdcy: 1e-6, ebd_dim: 100                 | lr: 0.01, wdcy: 1e-5, ebd_dim: 80                                  |
| FFM    | lr: 0.1, wdcy: 1e-6, ebd_dim: 8                   | lr: 0.1, wdcy: 1e-6, ebd_dim: 4                                    |
| RaFM   | lr: 0.01, wdcy: 1e-6, ebd_dim: {32,64,128}        | lr: 0.01, wdcy: 1e-6, ebd_dim: {32,64,128}                         |
| LLFM   | lr: 0.0001, a_p: 4, ebd_dim: 64, l2_reg: 1e-6     | lr: 0.0001, a_p: 2, ebd_dim: 64, l2_reg: 1e-6                      |
| DeepFM | lr: 0.1, wdcy: 1e-6, ebd_dim: 30, dr: 0.7         | lr: 0.1, wdcy: 1e-6, ebd_dim: 10, dr: 0.3                          |
| IPNN   | lr: 0.01, wdcy: 1e-6, ebd_dim: 40                 | lr: 0.01, wdcy: 1e-6, ebd_dim: 10                                  |
| OPNN   | lr: 0.01, wdcy: 1e-6, ebd_dim: 40                 | lr: 0.01, wdcy: 1e-6, ebd_dim: 10                                  |
| Ours   | lr: 0.1, wdcy: 1e-8, $\lambda$ : 1e-5, ebd_dim: 8 | lr: 0.01, wdcy: 1e-6, $\lambda$ : 1e-3, ebd_dim: $\log_{1.6}(d_i)$ |

Table 2: Standard deviations of the Logloss reported in our paper.

| Method | Avazu                | Criteo               |
|--------|----------------------|----------------------|
| LR     | $0.1 \times 10^{-4}$ | $0.1 \times 10^{-4}$ |
| GBDT   | $0.0 \times 10^{-4}$ | $0.0 \times 10^{-4}$ |
| FM     | $2.0 \times 10^{-4}$ | $2.3 \times 10^{-4}$ |
| FFM    | $0.3 \times 10^{-4}$ | $0.3 \times 10^{-4}$ |
| RaFM   | $0.0 \times 10^{-4}$ | $0.0 \times 10^{-4}$ |
| LLFM   | $0.0 \times 10^{-4}$ | $0.0 \times 10^{-4}$ |
| DeepFM | $0.7 \times 10^{-4}$ | $0.8 \times 10^{-4}$ |
| IPNN   | $1.2 \times 10^{-4}$ | $1.0 \times 10^{-4}$ |
| OPNN   | $1.0 \times 10^{-4}$ | $1.0 \times 10^{-4}$ |
| Ours   | $2.0 \times 10^{-4}$ | $0.5 \times 10^{-4}$ |

The first inequality uses Jensen’s inequality, and the second equality uses the property  $\mathbb{E}[\sigma_i \sigma_j] = \mathbb{E}[\sigma_i] \mathbb{E}[\sigma_j] = 0$  for  $i \neq j$ . The last equality uses the properties that  $\mathbf{x}_j^{(i)}$  is a one-hot vector and  $\tilde{\mathbf{x}}_j^{(-i)}$  has exactly  $m$  1s. Follow the same steps and we can get  $\mathbb{E}_\sigma \left[ \left\| \sum_{j=1}^n \sigma_j \tilde{\mathbf{x}}_j^{(-i)} \right\|_F \right] \leq (mn)^{\frac{1}{2}}$ .

Combine above results and we can get:

$$\widehat{\mathfrak{R}}_S(\mathcal{H}) \leq \frac{1}{n} (mn)^{\frac{1}{2}} \sum_{i=1}^m (N_1^{(i)} + N_2^{(i)}) = \sqrt{\frac{m}{n}} \sum_{i=1}^m (N_1^{(i)} + N_2^{(i)}) \quad (16)$$

so we complete the proof.

## 4 Experiment details

The hyper-parameters for each baseline are presented in Table 1. Table 2 shows the standard deviations of the Logloss reported in our paper, which are based on 5 runs.

## References

- [1] Mehryar Mohri, Afshin Rostamizadeh, and Ameet Talwalkar. *Foundations of machine learning*. MIT press, 2018.
